# Supplementary material for: The laser-triggered dynamical plasmonic optical trapping of targets and advanced Raman detection sensitivity
Source: Royal Society of Chemistry journal article supplement (doi:10.1039/d0cc04726k), 2020-01-01
Supplement: d0cc04726k1.pdf [file d0cc04726k1.pdf]

Electronic Supplementary Information (ESI)

## **Laser-triggered dynamical plasmonic optical trapping targets advanced Raman detection sensitivity**

Yan Kang<sup>a</sup>, Feng Yang<sup>b</sup>, Ting Wu<sup>a</sup>, Siqian Lu<sup>a</sup>, Yiping Du<sup>a,\*</sup>, Haifeng Yang<sup>c,\*</sup>

- a. Center of Analysis and Test, School of Chemistry and Molecular Engineering,  
East China University of Science and Technology, Shanghai 200237, China.
- b. Department of Laboratory Medicine, Huadong Hospital, Fudan University,  
Shanghai, 200040, China
- c. Department of Chemistry, Shanghai Normal University, Shanghai, 200234, China

### **Experimental Section**

SERS experiments were conducted using a Horiba HR evolution Raman (Horiba, Japan) equipped with a 50× objective and a grating with 600 grooves/mm. Acquisition of SERS spectra employed laser of 532 nm as the excitation source and laser power of 1 mW.

Extinction spectra were acquired using the internal white light source embedded in the HR evolution microspectrometer (Horiba, Japan) for excitation. The reflected light of Ag sol before laser scanning and Ag aggregate after laser scanning (the bright spot) was collected with a 50× microscope objective (Olympus M-Plan, NA 0.5). The sample was dropped on aluminium foil. Detection of the reflectance spectroscopy (R) was accomplished with a Peltier cooled CCD (Sincerity), using the tungsten lamp of microscope as a visible light source and 325 nm edge filter. We considered the absorbance profile to assign the plasmon resonance, calculated as  $-\lg(R/R_0)$ , where  $R_0$  is the reflectance spectroscopy of a standard PTFE plate purchased from Labsphere (USA).

### **S1 Preparation of Ag nanoparticles**

Ag nanoparticles were prepared by reducing silver nitrate using sodium citrate<sup>1</sup>. In a typical experiment, 18 mg AgNO<sub>3</sub> was dissolved in 100 mL of H<sub>2</sub>O and brought to boiling. A solution of 1% sodium citrate (2 mL) was added drop by drop to the

AgNO<sub>3</sub> solution. The mixed solution was kept on boiling for 45 min. The prepared colloid was rinsed with water and ethanol for several times and stored at -4 °C. The silver sol was mixed with targets, shaking for 5 min and followed by concentrating the mixture under centrifugation at 4000 r/min for 8 min. The mixture was concentrated for 20 times, dropping 20 µL mixture on a glass slide for use.

## S2 Sample preparation

A *Serratia marcescens* standard strain ATCC8100 was provided by Shanghai Clinical Inspection Center. Ten clinically isolated strains were provided by East China Hospital Affiliated to Fudan University (Shanghai, China). The strains were collected and isolated from infected body fluid samples of patients in the outpatient department and inpatient department of East China Hospital.

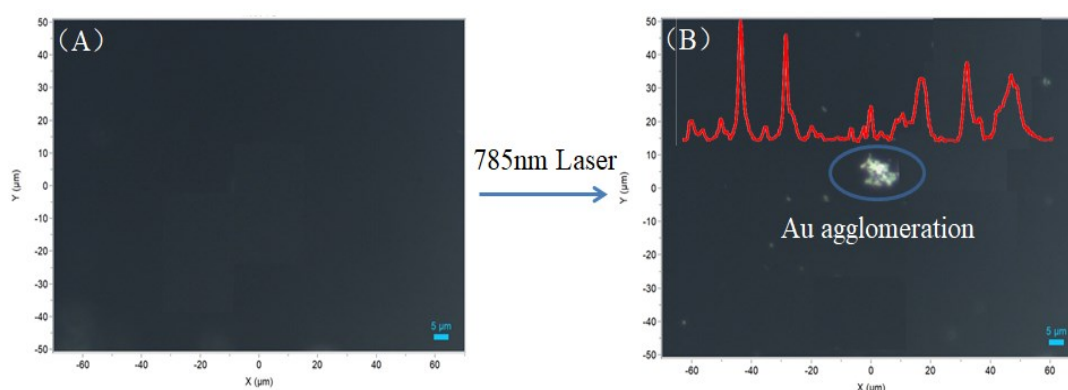

Fig. S1 The micrograph of laser induced agglomeration process of Au sol. The micrograph of concentrated Au sol before (A) and after (B) acquiring the SERS spectrum; The circled bright spot is the Au aggregate.

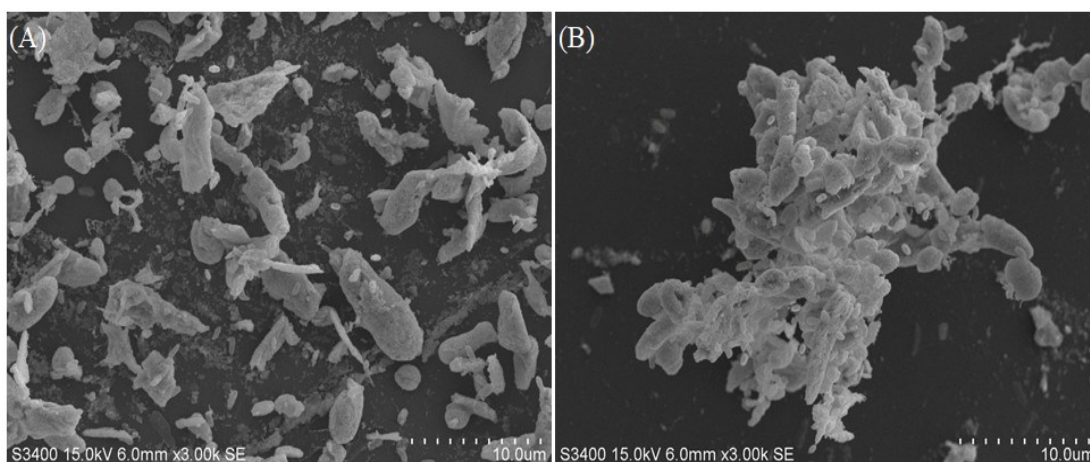

Fig. S2 The SEM images of Ag sol (A) and Ag aggregate induced by laser irradiation (B) mixed with *Serratia marcescens* following freeze drying.

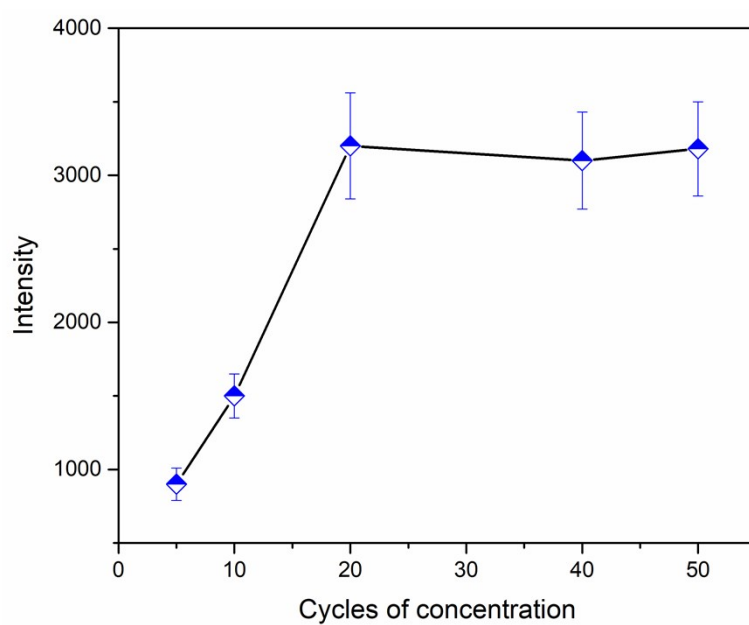

Fig. S3 The influence of the cycles of concentration for Ag sol

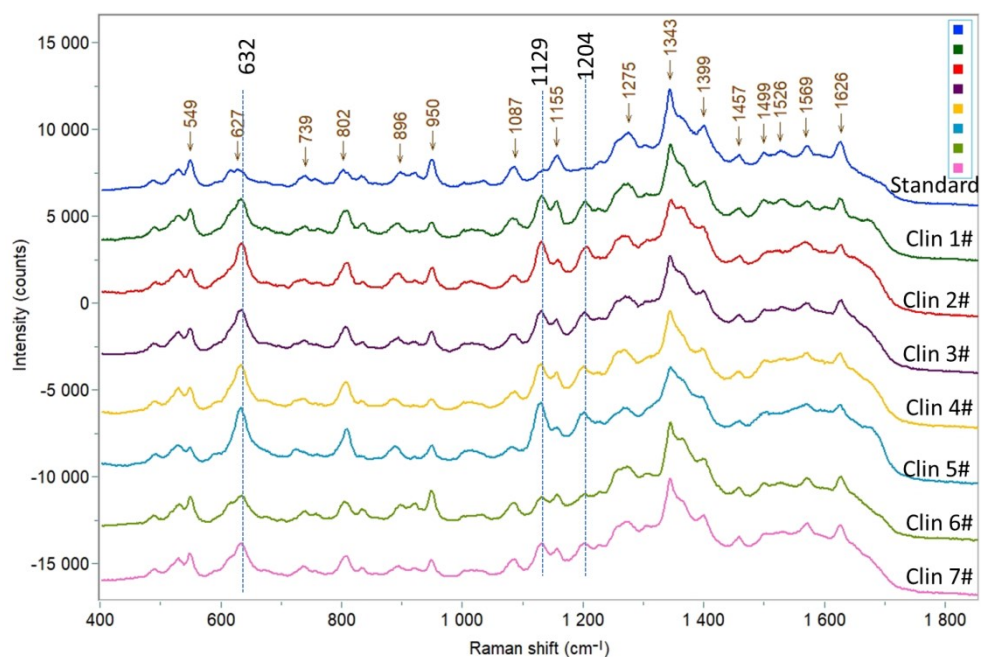

Fig. S4 The SERS spectra of *Serratia marcescens* standard strain ATCC8100 and 7 clinically isolated strains of patients in hospital (Clin 1# to Clin 7#).

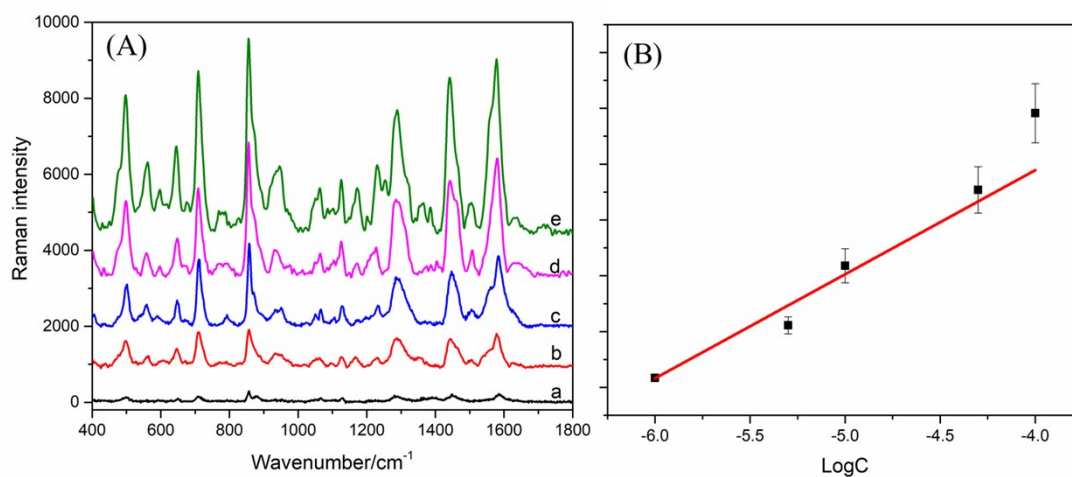

Fig. S5 (A) The spectra of TBBPA with different concentration (a)  $10^{-6}$  M, (b)  $5 \times 10^{-6}$  M, (c)  $10^{-5}$  M, (d)  $5 \times 10^{-5}$  M, (e)  $10^{-4}$  M. (B) Plot of intensity at  $855 \text{ cm}^{-1}$  versus different TBBPA concentrations with a linear range of  $10^{-6}$  M to  $10^{-4}$  M and  $R^2=0.96$ .

Table S1. Observed Raman bands of *Serratia marcescens* and their assignments

| Peak (cm <sup>-1</sup> ) | component                  | band assignments                                                               |
|--------------------------|----------------------------|--------------------------------------------------------------------------------|
| 549                      | protein                    | $\nu$ (C-S)                                                                    |
| 627                      | DNA                        | ring breathing mode of Adenine <sup>2</sup>                                    |
| 739                      | cytochrome c               | pyrrole breathing mode <sup>3</sup>                                            |
| 801                      | nucleic acid               | PO <sub>2</sub> <sup>-</sup> ,skeleton stretching <sup>4</sup>                 |
| 896                      | DNA/protein                | $\nu$ (C-C) <sup>5</sup>                                                       |
| 949                      | protein/ribose/deoxyribose | Skeleton N–C–C stretch <sup>6</sup> /<br>vibration of purine ring <sup>7</sup> |
| 1086                     | nucleic acid/lipid         | $\nu$ (PO <sub>2</sub> <sup>-</sup> )/ C–O–C stretching <sup>4</sup>           |
| 1129                     | cytochrome c               | $\nu$ (C-N) <sup>3</sup>                                                       |
| 1155                     | carbohydrate               | $\nu$ (C–O) <sup>3</sup>                                                       |
| 1202                     | adenine/ protein           | phenyl ring <sup>5</sup>                                                       |
| 1274                     | protein/ nucleic acid      | amide III <sup>5</sup>                                                         |
| 1343                     | nucleic acids/protein      | CH <sub>2</sub> deformation mode <sup>5</sup>                                  |
| 1398                     | protein                    | COO <sup>-</sup> symmetric stretch <sup>8</sup>                                |
| 1457                     | lipid                      | CH <sub>2</sub> deformation mode <sup>5</sup>                                  |
| 1499                     | phenylalanine/tyrosine     | (C=C) ring vibrations <sup>9</sup>                                             |
| 1525                     | protein                    | amide II <sup>10</sup>                                                         |
| 1569                     | cytochrome c               | $\nu$ (C=C) <sup>9</sup>                                                       |
| 1626                     | protein                    | amide I $\nu$ (C=O) <sup>5</sup>                                               |

Table S2 Experimental, theoretical results of TBBPA and their assignments

| Experimental<br>(cm <sup>-1</sup> ) | Theoretical<br>(cm <sup>-1</sup> ) | Assignments                                                                                                                                                    |
|-------------------------------------|------------------------------------|----------------------------------------------------------------------------------------------------------------------------------------------------------------|
| 498                                 | 492                                | 62% $\gamma_{\text{ring}}$ +23% $\tau_{\text{C-C-C-H}}$ +10% $\delta_{\text{C-C-C}}$                                                                           |
| 648                                 | 648                                | 41% $\gamma_{\text{ring}}$ +20% $\tau_{\text{C=C-C-O}}$ + 18% $\tau_{\text{C=C-C-Br}}$ +17% $\tau_{\text{C=C-C-H}}$                                            |
| 709                                 | 699                                | 46% $\delta_{\text{ring}}$ +19% $\nu_{\text{C-Br}}$ +21% $\delta_{\text{C=C-O}}$                                                                               |
| 855                                 | 853                                | 40% $\delta_{\text{ring}}$ +33% $\delta_{\text{Cring-H}}$ +11% $\tau_{\text{Br-C-C-H}}$ +10% $\nu_{\text{C-C}}$                                                |
| 1065                                | 1063                               | 41% $\delta_{\text{ring}}$ + 22% $\delta_{\text{C=C-H}}$ +13% $\delta_{\text{C=C-Br}}$ + 12% $\nu_{\text{C-Br}}$                                               |
| 1129                                | 1134                               | 25% $\delta_{\text{CH}_3}$ +25% $\tau_{\text{Cring-H}}$ + 16.3% $\delta_{\text{carbon skeleton}}$ +13.9 % $\nu_{\text{C-C}}$ +<br>10 % $\tau_{\text{C=C-C-C}}$ |
| 1283                                | 1285                               | 42% ring breathing+35% $\delta_{\text{C=C-H}}$ + 9% $\nu_{\text{C-O}}$ + 8% $\delta_{\text{C-O-H}}$                                                            |
| 1443                                | 1472                               | 23% $\delta_{\text{CH}_3}$ + 57% $\tau_{\text{C-C-C-H}}$ +15% $\delta_{\text{C=C-H}}$                                                                          |
| 1583                                | 1573                               | 45% $\nu_{\text{C=C}}$ +23% $\delta_{\text{C=C-C}}$ +12% $\delta_{\text{C=C-O}}$ +10% $\delta_{\text{C=C-Br}}$                                                 |
|                                     | 1606                               | 55% $\nu_{\text{C=C}}$ +24% $\delta_{\text{C=C-H}}$ +7% $\delta_{\text{C=C-Br}}$ + 8% $\delta_{\text{C=C-O}}$                                                  |

## References

- 1 P. C. Lee, D. Meisel. *J. Phys. Chem.*, 1982, **86**, 3391-3395.
- 2 S. M. A. Hasan, Y. He, T. W. Chang, J. Wang, M.R. Gartia, *J. Phys. Chem. C*, 2019, **123**, 698-709.
- 3 L. Cui, K. Yang, H. Z. Li, H. Zhang, J.Q. Su, M. Paraskevaidi, F. L. Martin, B. Ren, Y. G. Zhu, *Anal. Chem.* 2018, **90**, 5082-5089.
- 4 Y. Wang, Z. Wei, Y. Zhang, Y. Chen, *Electrophoresis*. 2019, **40**, 2104-2111.
- 5 D. Serban, S. F. Arcineigas, C.E. Vorgias, G. J. Thomas, *Protein Sci.*, 2003, **12**, 861-870.
- 6 Z.Q. Wen, *J. Pharm. Sci.*, 2007, **96**, 2861-2878.
- 7 Y. Li, X. Han, S. Zhou, Y. Yan, X. Xiang, B. Zhao, X. Guo, *J. Phys. Chem. Lett.* 2018, **9**, 3245-3252.
- 8 B. Fazio, C. D'Andrea, A. Foti, E. Messina, A. Irrera, M. G. Donato, V. Villari, N. Micali, O. M. Maragò, P. G. Gucciardi, *Sci. Rep.*, 2016, **6**, doi:10.1038/srep26952.
- 9 S. Kloss, B. Kampe, S. Sachse, P. Roesch, E. Straube, W. Pfister, M. Kiehntopf, J. Popp, *Anal. Chem.* 2013, **85**, 9610-9616.
- 10 M. Bittel, C. B. Y. Cordella, A. Assaf, S. Jouanneau, M.J. Durand, G. Thouand. *Environ. Sci. Technol.*, 2015, **49**, 12324-12332.
